# Supplementary material for: CAS-viewer: web-based tool for splicing-guided integrative analysis of multi-omics cancer data
Source: PubMed Central journal article supplement (PMC5918456; doi:10.1186/s12920-018-0348-8), 2018-04-20
Supplement: 12920_2018_348_MOESM1_ESM.pdf [file 12920_2018_348_MOESM1_ESM.pdf]

**Supplementary Table 1. Summary of the 33 cancer types in TCGA and the cases compiled in CAS-viewer.**

| Type      | mRNA expression  | DNA methylation       | miRNA expression |
|-----------|------------------|-----------------------|------------------|
| Platform  | Illumina HiSeq   | HumanMethylation 450K | Illumina HiSeq   |
| TCGA-BRCA | 1093             | 783                   | 749              |
| TCGA-HNSC | 520              | 528                   | 483              |
| TCGA-LGG  | 516              | 516                   | 510              |
| TCGA-THCA | 505              | 507                   | 502              |
| TCGA-PRAD | 497              | 498                   | 491              |
| TCGA-LUAD | 515              | 458                   | 448              |
| TCGA-UCEC | 370 <sup>1</sup> | 431                   | 398              |
| TCGA-BLCA | 408              | 412                   | 409              |
| TCGA-STAD | 415              | 396                   | 387              |
| TCGA-LIHC | 371              | 377                   | 369              |
| TCGA-LUSC | 501              | 370                   | 336              |
| TCGA-KIRC | 531              | 319                   | 239              |
| TCGA-CESC | 305              | 307                   | 306              |
| TCGA-COAD | 285              | 297                   | 251              |
| TCGA-KIRP | 290              | 275                   | 286              |
| TCGA-SARC | 259              | 261                   | 256              |
| TCGA-ESCA | 184              | 185                   | 182              |
| TCGA-PAAD | 178              | 184                   | 177              |
| TCGA-PCPG | 179              | 179                   | 178              |
| TCGA-TGCT | 150              | 150                   | 149              |
| TCGA-GBM  | 154              | 287                   | 566 <sup>3</sup> |
| TCGA-THYM | 120              | 124                   | 124              |
| TCGA-SKCM | 103              | 104                   | 97               |
| TCGA-READ | 94               | 98                    | 89               |
| TCGA-MESO | 87               | 87                    | 87               |
| TCGA-ACC  | 79               | 80                    | 79               |
| TCGA-UVM  | 80               | 80                    | 80               |
| TCGA-KICH | 66               | 66                    | 65               |
| TCGA-UCS  | 57               | 57                    | 56               |
| TCGA-DLBC | 48               | 48                    | 47               |
| TCGA-CHOL | 36               | 36                    | 36               |
| TCGA-OV   | 304              | 592 <sup>2</sup>      | 477              |
| TCGA-LAML | 123              | 140                   | 136 <sup>4</sup> |
| Total     | 9423             | 9232                  | 9045             |

<sup>1</sup> mRNA expression for this cancer type were compiled with the data generated by the Illumina GA platform. <sup>2</sup> DNA methylation for this cancer type were compiled with the data generated by the HumanMethylation27K BeadChip platform. <sup>3</sup> miRNA expression for this cancer type were compiled with the data generated by the Agilent 8 x 15K Human miRNA-specific microarray platform. <sup>4</sup> miRNA expression for this cancer type were compiled with the data generated by the Illumina GA platform.
